# Supplementary material
Source: PubMed Central journal article supplement (PMC5223032)
Supplement: mmc1.pdf [file mmc1.pdf]

## Supplemental Data

### Mutations in the Chromatin Regulator Gene *BRPF1*

### Cause Syndromic Intellectual Disability

### and Deficient Histone Acetylation

Kezhi Yan, Justine Rousseau, Rebecca Okashah Littlejohn, Courtney Kiss, Anna Lehman, Jill A. Rosenfeld, Constance T.R. Stumpel, Alexander P.A. Stegmann, Laurie Robak, Fernando Scaglia, Thi Tuyet Mai Nguyen, He Fu, Norbert F. Ajeawung, Maria Vittoria Camurri, Lin Li, Alice Gardham, Bianca Panis, Mohammed Almannai, Maria J. Guillen Sacoto, Berivan Baskin, Claudia Ruivenkamp, Fan Xia, Weimin Bi, DDD Study, CAUSES Study, Megan T. Cho, Thomas P. Potjer, Gijs W.E. Santen, Michael J. Parker, Natalie Canham, Margaret McKinnon, Lorraine Potocki, Jennifer J. MacKenzie, Elizabeth R. Roeder, Philippe M. Campeau, and Xiang-Jiao Yang

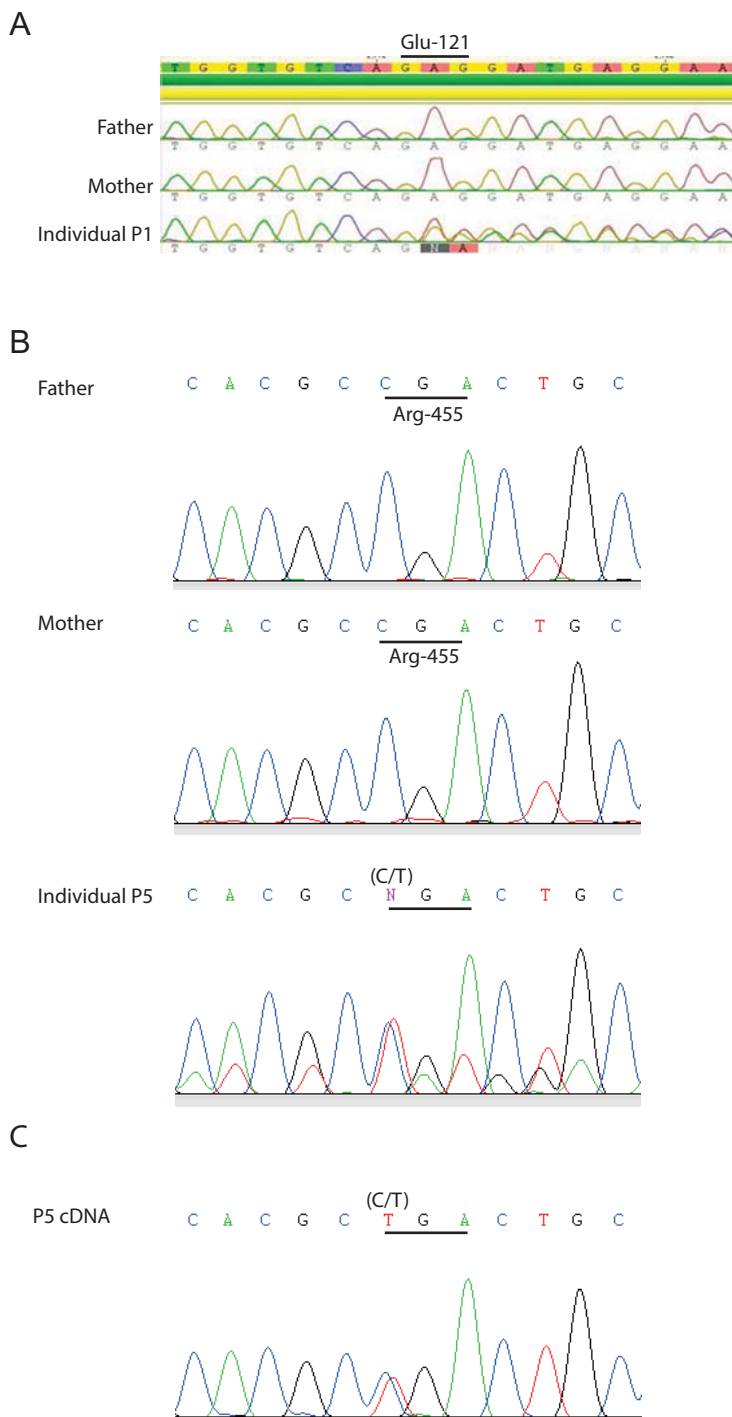

### Figure S1. Confirmation of two de novo BRPF1 mutations by Sanger sequencing

(A) Sanger sequencing chromatograms of genomic DNA from individual P1 and her parents. Only the region around the mutation site is displayed here. Unlike her parents, she contains an AG deletion (c.362\_363delAG, Table 1), which introduces a reading-frame shift starting at the codon for Glu-121 of BRPF1.

(B) Sequencing chromatograms of genomic DNA from individual P5 and her parents. Only the region at the mutation site is shown here. Unlike her parents, she is heterozygous for the mutation c.1363C>T (Table 1). In the mutated allele, the mutation introduces a TGA stop codon that replaces the codon for Arg-455 of BRPF1.

(C) Sanger sequencing chromatogram of fibroblast cDNA from individual P5. The results not only confirm that she is heterozygous for the mutation c.1363C>T, but also show that the normal and mutant alleles are expressed to similar levels.



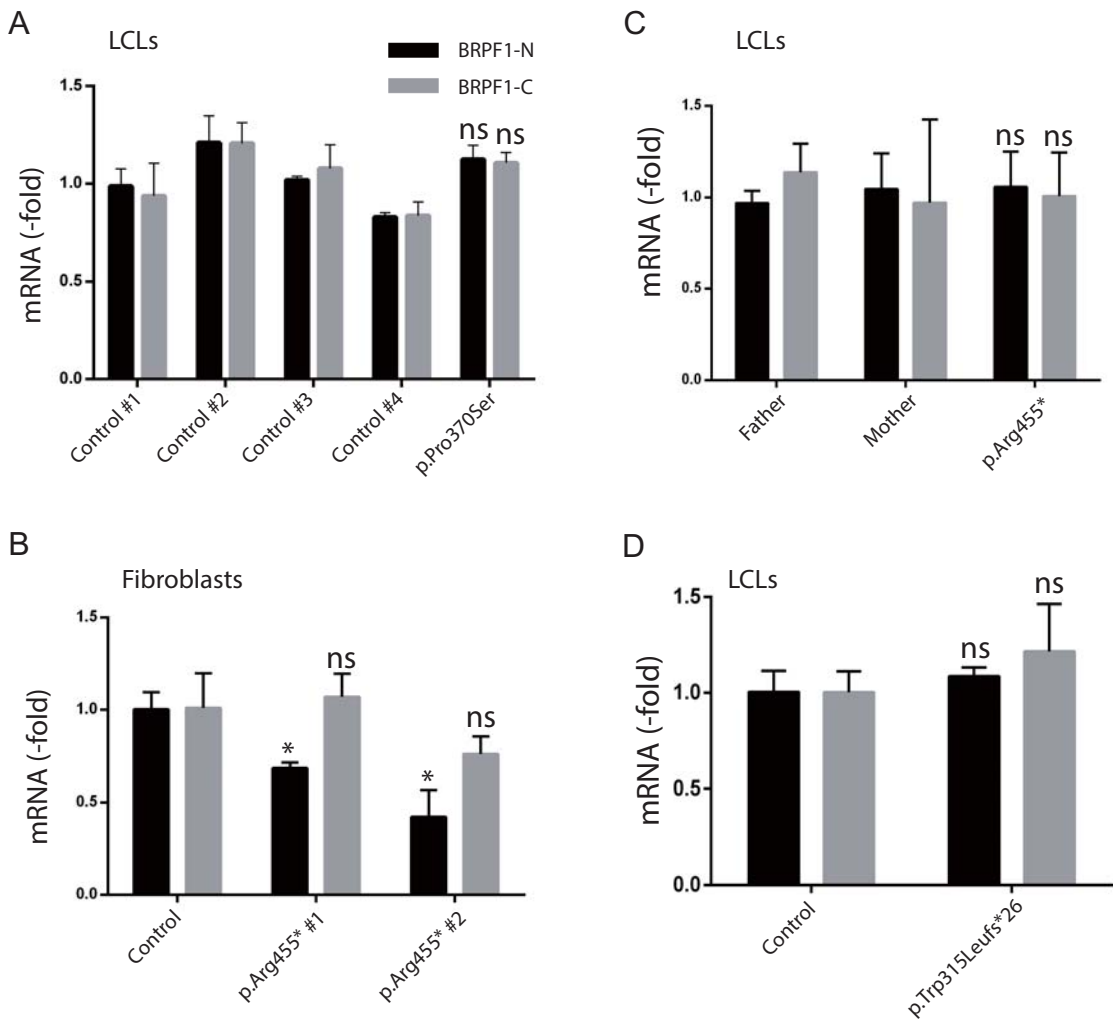

**Figure S3. *BRPF1* mRNA levels in normal and mutant cells**

(A) RT-qPCR analysis of *BRPF1* mRNA in control and p.Pro370Ser lymphoblastoid cell lines (LCLs). BRPF1-N, RT-qPCR using primers amplifying a region encoding an N-terminal part of BRPF1; BRPF1-C, RT-qPCR using primers amplifying a region encoding a C-terminal part of BRPF1.

(B) Analysis of *BRPF1* mRNA in control and p.Arg455\* fibroblasts. Two different batches of fibroblasts were tested. RT-qPCR primers were the same as those used in (A).

(C) RT-qPCR analysis of *BRPF1* mRNA in LCLs prepared from individual P5 (encoding the variant p.Arg455\*) and her parents.

(D) Analysis of *BRPF1* mRNA in control and p.Trp315Leufs\*26 LCLs. RT-qPCR primers were the same as those used in (A). The experiments in (A-D) were repeated three times and mean values are presented with standard deviations. ns, not statistically significant when compared to the corresponding control(s); \*,  $p < 0.05$ .

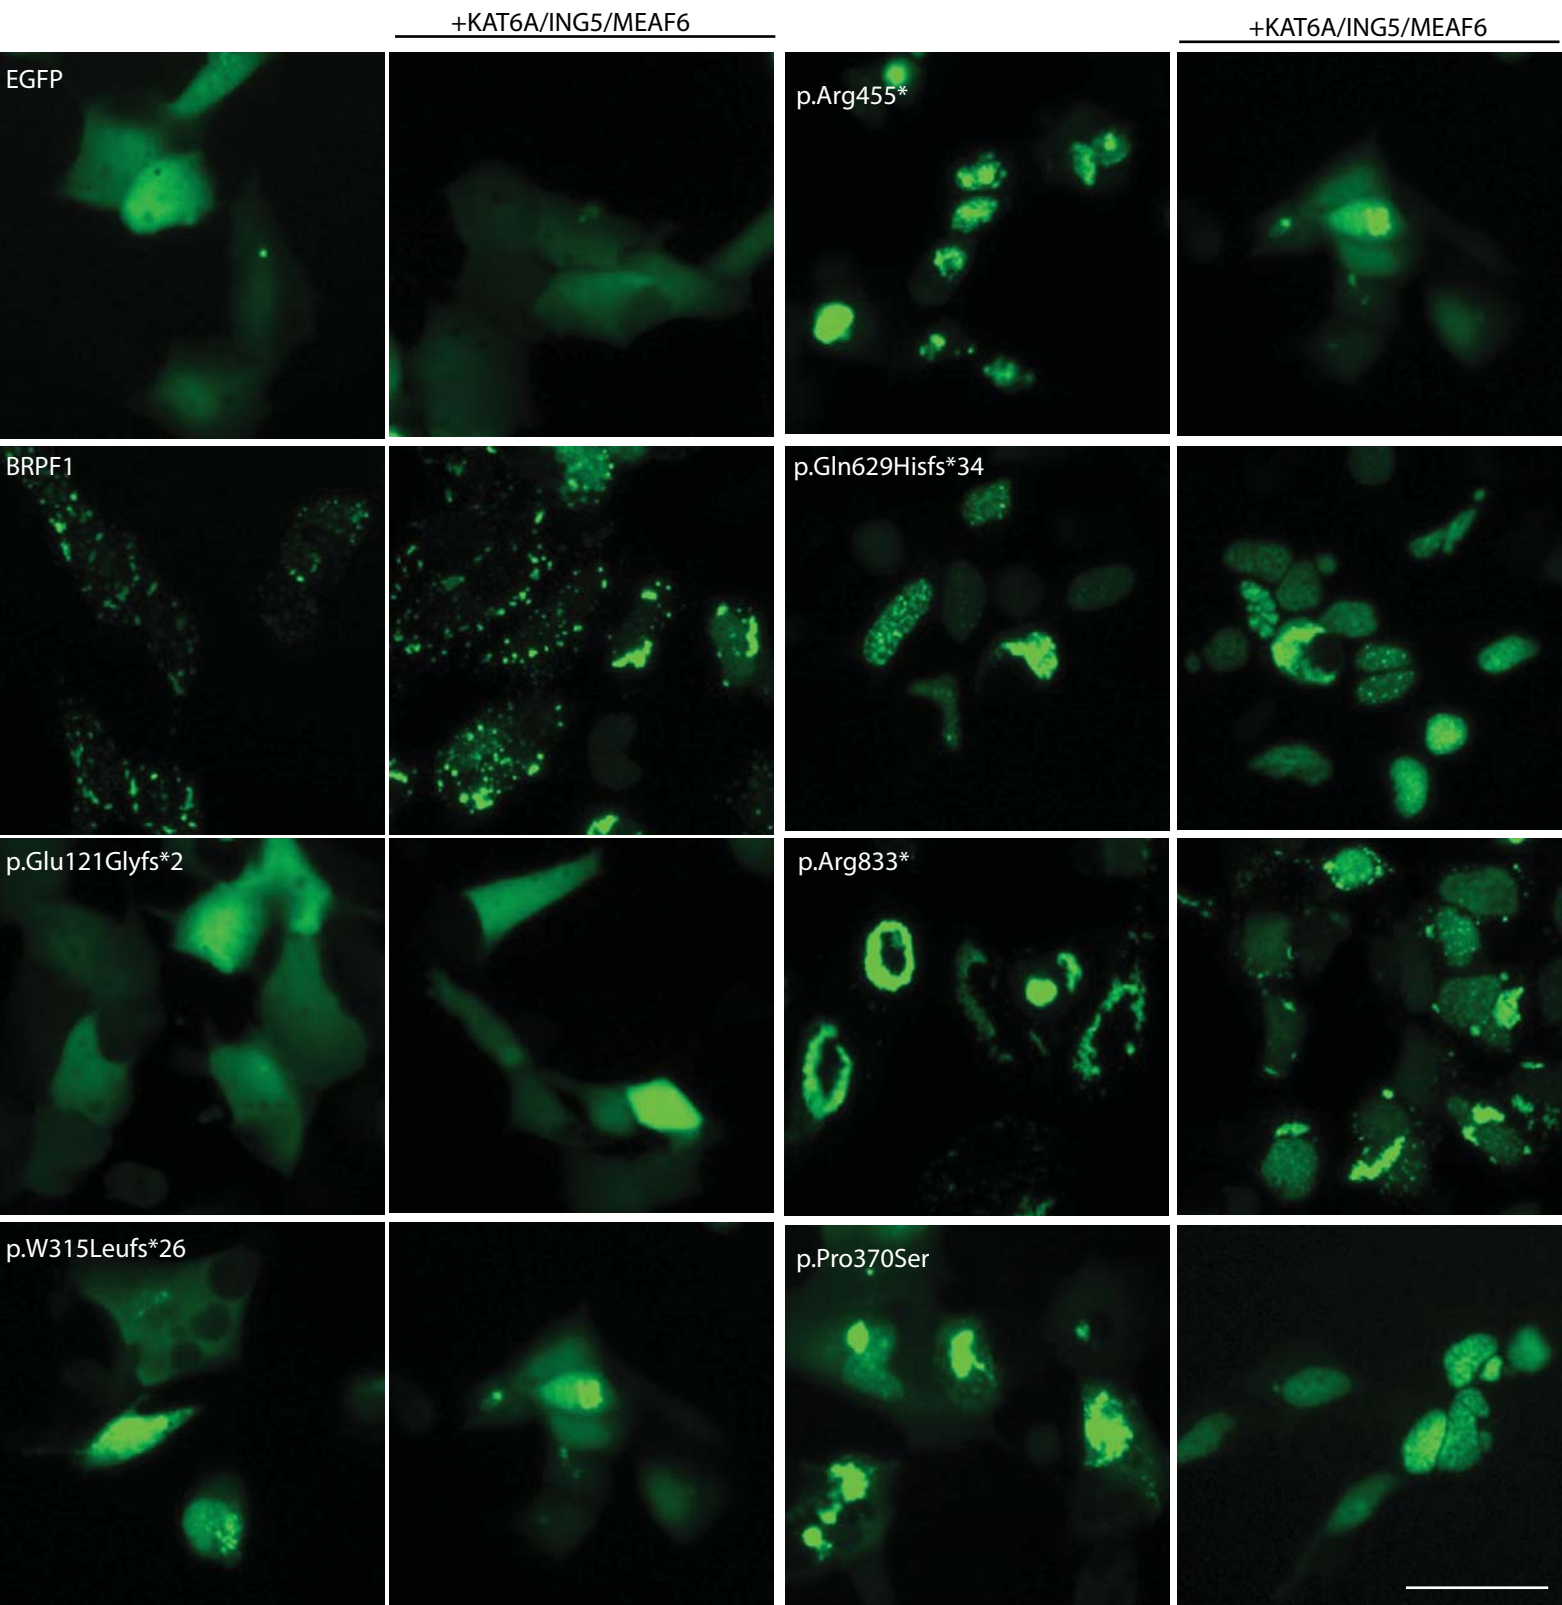

#### Figure S4. Subcellular localization of BRPF1 and its variants

BRPF1 and its variants were produced as EGFP-tagged fusion proteins in HEK293 cells, with or without exogenous KAT6A, ING5 and MEAF6 as indicated. EGFP itself was used as the negative control. About 18 h post-transfection, GFP signals were determined by live fluorescence microscopy. For NIH3T3 fibroblasts, it is known that BRPF1 formed cytoplasmic dots but became nuclear when KAT6A was also produced.<sup>2</sup> Images shown here were taken 18 h after transfection. In the presence of exogenous KAT6A, ING5 and MEAF6, BRPF1 was mainly cytoplasmic at that time (as shown here), but became mainly nuclear in 50% cells at 36 h after transfection (data not shown). No such changes were found when BRPF1 was produced alone (data not shown). Scale bar, 50  $\mu$ m.

**Table S1. Detailed features of 10 individuals with heterozygous *BRPF1* mutations**

| Individuals                | P1                                                                                                                            | P2                                                                                    | P3                                                                                    | P4                                                                                                                                                                                         | P5                | P6                                                                                           | P7                | P8                          | P9                                   | P10                          |
|----------------------------|-------------------------------------------------------------------------------------------------------------------------------|---------------------------------------------------------------------------------------|---------------------------------------------------------------------------------------|--------------------------------------------------------------------------------------------------------------------------------------------------------------------------------------------|-------------------|----------------------------------------------------------------------------------------------|-------------------|-----------------------------|--------------------------------------|------------------------------|
| Gender                     | Female                                                                                                                        | Male                                                                                  | Female                                                                                | Male                                                                                                                                                                                       | Female            | Male                                                                                         | Male              | Female                      | Female                               | Female                       |
| Mutation in NM_001003694.1 | c.362_363 delAG                                                                                                               | c.942_955 del                                                                         | c.942_955 del                                                                         | c.1108C>T                                                                                                                                                                                  | c.1363C>T         | c.1688_1689del                                                                               | c.1883_1886dup    | c.2497C>T                   | c.2915dup C                          | c.3298C>T                    |
| Alteration in BRPF1        | p.Glu121Gly fs*2                                                                                                              | p.Trp315Leu fs*26                                                                     | p.Trp315Leu fs*26                                                                     | p.Pro370Ser                                                                                                                                                                                | p.Arg455*         | p.His563 Profs*8                                                                             | p.Gln629 Hisfs*34 | p.Arg833*                   | p.Met973 Asnfs*24                    | p.Arg1100*                   |
| Mode of transmission       | <i>De novo</i>                                                                                                                | Parental samples not available                                                        | Parental samples not available                                                        | Mosaic in unaffected mother (mosaicism, 7% in blood DNA, based exome sequencing reads)                                                                                                     | <i>De novo</i>    | <i>De novo</i>                                                                               | <i>De novo</i>    | <i>De novo</i>              | <i>De novo</i>                       | <i>De novo</i>               |
| Family history             | 2 older healthy maternal half-siblings. Mother with history of meningioma. Father with joint hypermobility. No consanguinity. | Similarly affected full sibling (P3). Biological mother with intellectual disability. | Similarly affected full sibling (P2). Biological mother with intellectual disability. | 2 sisters in good health. Brother has dyslexia and learning difficulties. No history of birth defects, learning difficulties, mental retardation or inherited disorders. No consanguinity. | Nil significant   | One brother IQ 120, normal development, ADHD. Parents both ADHD but with university degrees. | Nil significant   | Paternal uncle has Tourette | Nil significant                      | Healthy younger sister       |
| Pregnancy issues           | Polyhydramnios, subjective                                                                                                    | Uncertain prenatal history.                                                           | Uncertain prenatal history.                                                           | No                                                                                                                                                                                         | Maternal diabetes | No                                                                                           | Early twin loss   | None                        | 1 <sup>st</sup> trimester bleed, nil | Ultrasound at 20 weeks soft- |

|                                           |                                                       |                                                                                                                                                                |                                                                              |                                                                                                                  |                                                                         |                                                                                              |                           |        |                                                                  |                                           |
|-------------------------------------------|-------------------------------------------------------|----------------------------------------------------------------------------------------------------------------------------------------------------------------|------------------------------------------------------------------------------|------------------------------------------------------------------------------------------------------------------|-------------------------------------------------------------------------|----------------------------------------------------------------------------------------------|---------------------------|--------|------------------------------------------------------------------|-------------------------------------------|
|                                           | decreased fetal movements                             |                                                                                                                                                                |                                                                              |                                                                                                                  |                                                                         |                                                                                              |                           |        | else                                                             | marker at heart                           |
| Delivery issues (specify gestational age) | 42 weeks, SROM, SVD                                   | 38 weeks. Tracheomalacia, Placed in foster care within first week of life as mother with ID. Father with cerebral palsy. An older sister had been adopted out. | Uncertain, though no known birth complications. Adopted at age of 17 months. | No, delivered at 39 weeks gestation                                                                              | 37w, SVD forceps, apgar 4-8, features consistent with Erb's palsy noted | Born at term Amniotic liquor, needed some extra oxygen Discharged from hospital within hours | Post-term; induced; NVD   | 40/40  | 37/40                                                            | 34 5/7 weeks                              |
| Birth weight                              | 7lb 13oz                                              | 7lb 12oz                                                                                                                                                       | NA                                                                           | 8 lb 3 oz                                                                                                        | 3955 g                                                                  | 3500 g                                                                                       | 3.54 kg                   | 2.7 kg | 5lb 7oz                                                          | 2145 g                                    |
| Birth length                              | NA                                                    | uncertain                                                                                                                                                      | NA                                                                           | 21 inches                                                                                                        | NA                                                                      | 49 cm                                                                                        | NA                        | NA     | NA                                                               | 44 cm                                     |
| Birth head circumference                  | NA                                                    | 50 <sup>th</sup> percentile                                                                                                                                    | NA                                                                           | NA                                                                                                               | NA                                                                      | NA                                                                                           | NA                        | NA     | NA                                                               | 32.6 cm                                   |
| Neonatal issues                           | No major concerns                                     | Tracheomalacia, hypothyroid. GERD, mild RAD, FTT                                                                                                               | NA                                                                           | Failure to thrive but resolved (had esophageal ulcer, peptic esophagitis and patulous gastroesophageal junction) | Neonatal hypertrophic cardiomyopathy, resolved                          | Little sleep, did not ask for feeding but no real feeding difficulties                       | Poor feeding              | None   | none                                                             | Hypotonia and tube feeding necessary      |
| Gross motor delay                         | Hypotonia, delay (sat 12 months; walked at 27 months) | Crawled 14m; walked 16months; GDD now ID. Toe walked                                                                                                           | Not recognized or reported                                                   | Hypotonia                                                                                                        | Yes                                                                     | Did not turn around or crawl, needed physiotherapy, could crawl at 15 months                 | First walked ~2 years old | None   | Walked at the age of 3, never more than short distances achieved | Hypotonia, yes, walked when 2.5 years old |

|                                                                          |                                                                                                                                                                                                                   |                                                                                                                                                                                          |                                                                                                                                                                                     |                                                                                                         |           |                                                                                                   |                                           |                  |                                      |               |
|--------------------------------------------------------------------------|-------------------------------------------------------------------------------------------------------------------------------------------------------------------------------------------------------------------|------------------------------------------------------------------------------------------------------------------------------------------------------------------------------------------|-------------------------------------------------------------------------------------------------------------------------------------------------------------------------------------|---------------------------------------------------------------------------------------------------------|-----------|---------------------------------------------------------------------------------------------------|-------------------------------------------|------------------|--------------------------------------|---------------|
|                                                                          |                                                                                                                                                                                                                   |                                                                                                                                                                                          |                                                                                                                                                                                     |                                                                                                         |           | and walk (unsteady) at 18 months                                                                  |                                           |                  |                                      |               |
| Fine motor delay                                                         | mild                                                                                                                                                                                                              | Yes                                                                                                                                                                                      | Yes, problems with significant bilateral fine motor coordination                                                                                                                    | NA                                                                                                      | Yes       | Normal                                                                                            | NA                                        | Delayed          | Palmar grip only                     | NI            |
| Language delay                                                           | Yes, Expressive>receptive                                                                                                                                                                                         | Yes                                                                                                                                                                                      | Yes                                                                                                                                                                                 | Yes and speech apraxia                                                                                  | Yes       | Delayed, spoke few words, language understanding and production was delayed. Has a low vocabulary | Speech delay                              | Moderate         | 2 single words, 1 <sup>st</sup> at 3 | yes           |
| Developmental delay or intellectual disability (please specify severity) | Global developmental delay; discrepant results on cognitive assessment: overall IQ 23 <sup>rd</sup> %ile (WPPSI-III) but low skills in general language index (9 <sup>th</sup> %ile), and extremely low in visual | Yes: GDD noted during infancy. At 7y10m: significant developmental problems in the area of language, visual perceptual fine motor problem solving and gross motor areas. He continues to | At 11 years old, intellectual functioning was assessed with the WISC-IV and found to be in the low average range with a Full Scale IQ of 88. Evaluation by psychiatry at the age of | global developmental delay (more prominent in expressive language), intellectual functioning disability | DD and ID | IQ 80-100 (brother and parents ≥120) Severe autism, Gilles de la Tourette, ADHD                   | Mild (main-stream school with extra help) | Mild-moderate ID | Severe ID                            | Mild ID IQ 56 |



|                                  |                                                              |                                                                                                                                                    |                                                                                                                                                                      |                                                                                           |                                                                                                                                                               |                      |                               |                                                  |                                                               |    |
|----------------------------------|--------------------------------------------------------------|----------------------------------------------------------------------------------------------------------------------------------------------------|----------------------------------------------------------------------------------------------------------------------------------------------------------------------|-------------------------------------------------------------------------------------------|---------------------------------------------------------------------------------------------------------------------------------------------------------------|----------------------|-------------------------------|--------------------------------------------------|---------------------------------------------------------------|----|
|                                  | perception skills (1 <sup>st</sup> %ile)                     | have his weakest area in the gross motor area. General developmental age is around 3 to 3-1/2 years of age.                                        | 14 years. documents more concerning history: defiant, oppositional, odd, episodes of encopresis at school. No autism.<br><br>Functions lower than cognitive testing. |                                                                                           |                                                                                                                                                               |                      |                               |                                                  |                                                               |    |
| Seizures                         | no                                                           | Yes; diagnosed with epilepsy with generalized tonic clonic seizures infrequently, now seizure free x2 years. Has been off AEDs for several months. | Yes, localization related epilepsy (partial seizures with secondary generalization, diagnosed at age 8y. Rx with AEDs x4years. Now off meds and. Seizure free        | No. EEG abnormal (treated with Trileptal and 30lb weight gain, but no clinical seizures). | Episodes of staring spells, consistent with absence seizures. However, EEG only showed high-voltage hypnagogic hypersynchrony, without epileptiform activity. | No                   | Yes (from 5/52)               | None                                             | Multiple types, not controlled by medication, evolving        | No |
| Other neurological abnormalities | Hypotonia, decreased muscle bulk with hyperextensible joints | Mild optic nerve hypoplasia.<br><br>Mild Central sleep apnea.                                                                                      | Optic nerve slightly small.                                                                                                                                          | NA                                                                                        | ADHD, dyspraxia, social processing disorder. hypotonia                                                                                                        | Hypotonic in infancy | Sleep disturbance (melatonin) | Diagnosed with autistic spectrum disorder age 12 | Progressive leg contractures secondary to muscular tightening |    |

|                                      |                                                                                               |                                                                                                                                                                      |                                           |                                                |                           |                                                  |                                  |                   |                                         |                                                                                     |
|--------------------------------------|-----------------------------------------------------------------------------------------------|----------------------------------------------------------------------------------------------------------------------------------------------------------------------|-------------------------------------------|------------------------------------------------|---------------------------|--------------------------------------------------|----------------------------------|-------------------|-----------------------------------------|-------------------------------------------------------------------------------------|
| Brain MRI                            | (June 2012): Hyper-intensities of the cortical white matter of the frontal lobes bilaterally. | Paucity of WM, thinning of corpus callosum. Small focus of gliotic change, possibly secondary to remote insult, in the anterior portion of right centrum semi-ovale. | Normal                                    | Normal                                         | Normal                    | Not done                                         | NA                               | Not done          | Global lack of white matter bulk only   | At ultrasound 2 small superependymal cysts. MRI in conclusion after revision normal |
| Age at last follow-up                | 6.5 y                                                                                         | 13y 3m                                                                                                                                                               | 13y 10m                                   | 11y 2m                                         | 8                         | 13                                               | 15 y                             | 8 y               | 17 y                                    | 12 y                                                                                |
| Weight at last follow-up             | 33kg (97 <sup>th</sup> % ile)                                                                 | 37.4kg (10 <sup>th</sup> ; Z=-1.28)                                                                                                                                  | Weight 73rd percentile                    | 49.5kg (91st %), general appearance overweight | 48.1k                     | 45,4 kg (+0,2 SDS)                               | 33.5kg/75-91 [aged 9 on 23.8.06] | 32.6kg            | 43.5kg                                  | 57 kg                                                                               |
| Height at last follow-up             | 126 cm (85-97 <sup>th</sup> % ile)                                                            | 144cm (4 <sup>th</sup> % ; Z=-1.81)                                                                                                                                  | Height 21st percentile                    | 146 cm (58th %)                                | 131.5cm                   | 159 cm (-0,3 SDS)                                | 137.7/50-75 [aged 9 on 23.8.06]  | 136.3cm           | 155cm                                   | 152 cm                                                                              |
| Head circumference at last follow-up | 53.5 cm (+1 to +2 SD)                                                                         | 54.5cm (54 <sup>th</sup> %; Z=0.11)                                                                                                                                  | FOC 83rd percentile                       | 52.3 cm                                        | 51cm                      | 56 cm (+0,5 SDS) Measured at age 13 yrs 7 months | 54.0/25-50 [aged 9 on 23.8.06]   | 54cm              | 49cm at age 12                          | normal                                                                              |
| Cranial shape                        | Normal                                                                                        | Normal                                                                                                                                                               | Normal                                    | Mild dolichocephaly                            | Narrow bifrontal diameter | Normal                                           | Normal                           | Normal            | Shape normal but markedly microcephalic | normal                                                                              |
| Forehead                             | Narrowing of forehead towards the apex                                                        | Normal                                                                                                                                                               | Broad, large/tall (Without frank bossing) | Frontal bossing                                | Normal                    | broad                                            | Normal                           | Broad             | Normal                                  | Broad                                                                               |
| Face, general                        | Round face, fontal                                                                            | See below                                                                                                                                                            | See below                                 | See below                                      | See below                 | Sparse facial                                    | See below                        | Round, dysmorphic | Mildly dysmorphic                       | Dysmorphic features                                                                 |

|                  |                                                                                                      |                                                                                                              |                                                                                                                                                          |                                                                                                                                                                                     |                                                                                                    |                                                            |                                 |                                                              |                                                              |                                                           |
|------------------|------------------------------------------------------------------------------------------------------|--------------------------------------------------------------------------------------------------------------|----------------------------------------------------------------------------------------------------------------------------------------------------------|-------------------------------------------------------------------------------------------------------------------------------------------------------------------------------------|----------------------------------------------------------------------------------------------------|------------------------------------------------------------|---------------------------------|--------------------------------------------------------------|--------------------------------------------------------------|-----------------------------------------------------------|
|                  | upsweep of hairline,                                                                                 |                                                                                                              |                                                                                                                                                          |                                                                                                                                                                                     |                                                                                                    | expressions                                                |                                 | c, small chin                                                | c                                                            |                                                           |
| Hair             | Normal                                                                                               | Upsweep of frontal hair line; normal texture and distribution                                                | Upsweep of frontal hair line. Normal texture and distribution.                                                                                           | Texture: mild hair on upper lip area. Pattern and color: central and hair whorls, some tapering of the posterior hairline laterally along the neck but hairline is not low overall. | Normal                                                                                             | cowlick                                                    | Normal                          | High frontal hairline                                        | Low frontal hairline                                         | normal                                                    |
| Eye dysmorphisms | Right-sided ptosis, hooded eyelids, upslanting palpebral fissures, broad and sparse lateral eyebrows | Hypertelorism. IPD: 6.2 (~97%ile); IC: 3.5/ OC: 9.5/ PF: 3.0) Mild downslant of PFs Full and robust eyebrows | Appears to have ptosis                                                                                                                                   | Narrow palpebral fissures Synophrys. Straight eyebrows. Narrow palpebral fissures seen in earlier age.                                                                              | Blepharophimosis, ptosis, medial flaring of eyebrows, hypertelorism, upslanting palpebral fissures | Ptosis                                                     | Downslanting palpebral fissures | Hypertelorism                                                | Normal                                                       | Epicanthal folds, short palpebral fissures, hypertelorism |
| Vision           | Farsighted                                                                                           | Hyperopia since early childhood// in addition has become more myopic with age                                | At age 13: Nystagmus, likely congenital. good vision with both eyes open<br><br>Optic nerves are slightly small in size. Compound hyperopic astigmatism, | Normal                                                                                                                                                                              | Normal                                                                                             | 60%, amblyopia, +4 dpt glasses. No inner eye abnormalities | Normal                          | Has a tendency to squint but no visual deficiency identified | Has a tendency to squint but no visual deficiency identified | normal                                                    |

|                  |                                                |                                                                                                                                                                                                                                      |                                       |                                                                                                                              |                                                   |                                   |                       |                                      |                                                                     |                          |
|------------------|------------------------------------------------|--------------------------------------------------------------------------------------------------------------------------------------------------------------------------------------------------------------------------------------|---------------------------------------|------------------------------------------------------------------------------------------------------------------------------|---------------------------------------------------|-----------------------------------|-----------------------|--------------------------------------|---------------------------------------------------------------------|--------------------------|
| Ear dysmorphisms | Normal in form with thick, fleshy ear helices. | Ears look small but measure between 25-50 percentile (5.5/5.8cm)<br>Right ear (5.5cm) is minimally low set. (see photo)                                                                                                              | Normal                                | Small right-sided Darwinian tubercle                                                                                         | Simple superior helices                           | Prominent conchae, small earlobes | Relatively small ears | Simple, low set, posteriorly rotated | Large, mildly low set                                               | Relatively simple formed |
| Hearing          | normal                                         | Normal                                                                                                                                                                                                                               | Normal                                | Normal                                                                                                                       | Normal                                            | Normal                            | Normal                | Normal                               | Normal                                                              | Normal                   |
| Nose             |                                                | Fleshy nose. Small nostrils.                                                                                                                                                                                                         | Fleshy nasal tip with small nostrils. | Full nasal ridge. Lateral buildup to the nose. Bulbous tip. Somewhat pointed nasal tip and narrow nares.                     | Flat nasal root, relatively small                 | Normal                            |                       | Normal                               | Normal                                                              | Flat nasal bridge        |
| Mouth            | cupid's bow upper lip,                         | Short philtrum. Small mouth/ (was micrognathic as younger child). Currently with malocclusion /"cross bite". Teeth extracted for crowding. Needed to have primary teeth extracted as they did not fall out when the adult teeth came | Short philtrum. Mouth normal.         | Small mouth, upper lip is somewhat thin and overhanging there is a cupid's bow, mildly smooth philtral pillars. Micrognathia | Relatively small, downturned corners of the mouth | Normal                            |                       | Full upper lip, widely spaced teeth  | Wide mouth, upturned upper lip, short philtrum, widely spaced teeth | Normal, full lips        |

|        |                                                                                                                                                                                       |                                    |                    |                                                                                                                      |                                                                                                        |                         |                           |                         |                        |                                 |
|--------|---------------------------------------------------------------------------------------------------------------------------------------------------------------------------------------|------------------------------------|--------------------|----------------------------------------------------------------------------------------------------------------------|--------------------------------------------------------------------------------------------------------|-------------------------|---------------------------|-------------------------|------------------------|---------------------------------|
|        |                                                                                                                                                                                       | in. Now has orthodontics in place. |                    |                                                                                                                      |                                                                                                        |                         |                           |                         |                        |                                 |
| Palate | Widely spaced teeth, prominent upper incisors, high-arched palate,                                                                                                                    | Narrow. Normal arch. Normal uvula. | Normal             | Teeth and gums overjet                                                                                               | Normal                                                                                                 | High arched             | Bifid uvula               | normal                  | normal                 | normal                          |
| Hands  | Hyperextensible joints of the hands: thumbs at MCPs, distal and proximal IP joints except for 5 <sup>th</sup> MCPs. Hand lengths normal (75 <sup>th</sup> %ile). Normal hand creases. | Normal                             | Normal             | Slightly squared thumbs, minimal degree cubitus valgus. Bridged transverse palmar creases bilaterally seen at age 5. | Left digitalized thumb with small extra bone (phalanx?). Bilateral 5 <sup>th</sup> finger clinodactyly | Normal                  | Fifth finger clinodactyly | Short, broad fingertips | Long, tapering fingers | Normal, atypical palmar creases |
| Feet   | Relatively short feet (25 <sup>th</sup> %ile in length) with 5 <sup>th</sup> toe medial clinodactyly, bilateral metatarsus adductus                                                   | Normal                             | Normal             | Mild two-three toe syndactyly                                                                                        | Normal                                                                                                 | overpronation of ankles | NA                        | Normal                  | Normal                 | normal                          |
| Heart  | Normal examination                                                                                                                                                                    | Normal examination                 | Normal examination | Normal                                                                                                               | Small patent ductus arteriosus, biventricular hypertrophic                                             | Normal examination      | Normal examination        | Normal                  | Normal                 | Mild pulmonary stenosis         |

|                                     |      |                                                                                                                                                                                                         |                                                                  |                                                                              |                                                                                              |                                                                              |      |                                                                  |                                                                     |                                                               |
|-------------------------------------|------|---------------------------------------------------------------------------------------------------------------------------------------------------------------------------------------------------------|------------------------------------------------------------------|------------------------------------------------------------------------------|----------------------------------------------------------------------------------------------|------------------------------------------------------------------------------|------|------------------------------------------------------------------|---------------------------------------------------------------------|---------------------------------------------------------------|
|                                     |      |                                                                                                                                                                                                         |                                                                  |                                                                              | cardiomyopathy thought to be secondary to maternal diabetes (resolved), atrial septal defect |                                                                              |      |                                                                  |                                                                     |                                                               |
| Kidneys                             | NA   | Normal RUS                                                                                                                                                                                              | Normal RUS/MRI<br>Normal VCUG (workup for enuresis)              | NA                                                                           | NA                                                                                           | Not evaluated                                                                | NA   | NA                                                               | Normal                                                              | normal                                                        |
| Feeding difficulties                | No   | FTT as infant with severe GERD. Had G-tube placed (with fundus) (has since been removed). Major feeding/GI issues as a younger child with gastroparesis, dysmotility. Prompted anal manometry (normal). | None known.                                                      | Neonatal period                                                              | No                                                                                           | Poor oral motor function (burping, munching, making a mess). Normal appetite | Yes  | Reflux, nil else                                                 | None                                                                | Neonatal and as a baby                                        |
| Other genetic findings (see note 2) | None | Heterozygous pathogenic variant of <i>MPDZ</i> , but no signs of                                                                                                                                        | Heterozygous pathogenic variant of <i>MPDZ</i> , but no signs of | <i>De novo</i> duplication of <i>ARID1B</i> gene. Inactivating <i>ARID1B</i> | BRAF c.956C>T p.Ser319Phe BRAF mutations in Noonan                                           | No other pathogenic mutations were found on                                  | None | Compound mutations in <i>AIP1L</i> , but one is benign. c.805G>A | Possibly pathogenic <i>de novo</i> mutation in <i>CBL</i> (c.1145A> | <i>PIK3R1</i> : NM_18152 c.1290del, p.Lys430Asnfs*14, hetero- |

|                         |                                                                                              |                                                                                                                     |                                                                   |                                                                                                                            |                                                                                                      |                                                                                              |      |                                                                                                                 |                                                                                                                                                                                                                                                                                                                            |                                                                                                                                |
|-------------------------|----------------------------------------------------------------------------------------------|---------------------------------------------------------------------------------------------------------------------|-------------------------------------------------------------------|----------------------------------------------------------------------------------------------------------------------------|------------------------------------------------------------------------------------------------------|----------------------------------------------------------------------------------------------|------|-----------------------------------------------------------------------------------------------------------------|----------------------------------------------------------------------------------------------------------------------------------------------------------------------------------------------------------------------------------------------------------------------------------------------------------------------------|--------------------------------------------------------------------------------------------------------------------------------|
|                         |                                                                                              | severe congenital hydrocephalus, caused by <i>MPDZ</i> mutations.                                                   | severe congenital hydrocephalus, caused by <i>MPDZ</i> mutations. | mutations in Coffin-Siris syndrome, but impact of <i>ARID1B</i> duplication remains unknown.                               | syndrome, but this mutation is benign.                                                               | exome. SNP-array was normal                                                                  |      | (p.Gly269Arg) & c.401A>T (p.Tyr134Phe). <i>AIPL</i> mutations in leber congenital amaurosis (retinal dystrophy) | T p.Lys382Ile.) but no signs of Noonan syndrome. Compound mutations in <i>TTI2</i> : c.1274A>C (p.His416Pro) & c.1100C>T (Pro367Leu), but the first is probably benign. <i>TTI2</i> forms a trimeric complex with two other proteins, one of which is linked to syndromic ID, but with much more severe clinical features. | zygous, and <i>de novo</i> . But there are no signs of SHORT syndrome, which is known to be caused by <i>PIK3R1</i> mutations. |
| Other clinical features | C spine fusion (C2/C3); Premature adrenarche without central puberty (age 7y); Constipation; | Hypothyroidism at age 2 months, currently with normal TSH off synthroid.<br><br>C2/C3 fusion. Congenital anomaly of | C2/C3 fusion. Mild disk bulges at C4-C5 and C5-C6                 | Bruises easily. Medications : albuterol sulphate, amoxicillin, cefdinir, fluticasone, oxcarbazepine, prednisone. Has a few | Joint hypermobility. Enlarged left S1 pedicle, abnormal contour to C2 and 3 with apparent underlying | Hypermobility in large joints of the lower extremities, Delayed toilet training (encopresis, | None | Extremely hypermobile at elbows. Puberty at 9, menarche at 10                                                   | Thelarche from 7, two bleeds only, found to be in ovarian failure, with post-menopausal hormone levels at 17                                                                                                                                                                                                               | Idiopathic pediatric discus calcification at T11-T12                                                                           |

|  |  |                                                                                                                                                                                                                                                                                                                                                           |  |                 |                           |                              |  |  |  |  |
|--|--|-----------------------------------------------------------------------------------------------------------------------------------------------------------------------------------------------------------------------------------------------------------------------------------------------------------------------------------------------------------|--|-----------------|---------------------------|------------------------------|--|--|--|--|
|  |  | <p>T9 with butterfly vertebra.</p> <p>Muscle biopsy: Mild variation in fiber size, focal fiber grouping, increased subsarcolemmal oxidative activity (NADH and COX), increased mitochondria (some enlarged and abnormally shaped), increased neutral lipid. Normal ETC enzyme activities except for mild decrease in NADH:ferricyanide dehydrogenase.</p> |  | scattered nevi. | segmentation abnormality. | constipation), Asthma eczema |  |  |  |  |
|--|--|-----------------------------------------------------------------------------------------------------------------------------------------------------------------------------------------------------------------------------------------------------------------------------------------------------------------------------------------------------------|--|-----------------|---------------------------|------------------------------|--|--|--|--|

Notes:

- 1) Abbreviations: NA, not available; NI: Normal; DD: developmental delay; ID: Intellectual disability; ADHD: attention deficit hyperactivity disorder.
- 2) Besides *BRPF1* variants, some individuals harbor mutations in other genes. For example, individual P4 carries a duplication of *ARID1B*, individual P8 expresses two compound *AIP1* variants, individual P9 possesses mutations in the *CBL* and *TTI2* genes, and individual P10 carries a pathogenic *PIK3R1* mutation (Table S1). Most of such genetic variants do not appear to be responsible for the major clinical features that we observed in the individuals (Table 2 and S1). For example, *PIK3R1* mutations have been linked to SHORT syndrome<sup>3</sup> and this individual's dysmorphisms do not resemble those reported in the literature. Cognition is typically normal for individuals with SHORT syndrome,<sup>3</sup> so the intellectual disability and speech delay in individual P10 are very likely due to the *BRPF1* mutation (Tables 1-2 and S1). One possible exception is



the *TTI2* mutation in individual P10. Alterations of *TTI2* itself and a close partner have been linked to syndromic intellectual disability,<sup>4,5</sup> but the resulting clinical features are much more severe than those in individual P10. Thus, an interesting possibility to be investigated is whether combined effects of different mutations in *BRPF1* and another gene may contribute to phenotypic variations among the 10 individuals (Tables 2 and S1).

## Supplemental References

1. Perry, J. (2006). The Epc-N domain: a predicted protein-protein interaction domain found in select chromatin associated proteins. *BMC Genomics* 7, 6.
2. Ullah, M., Pelletier, N., Xiao, L., Zhao, S.P., Wang, K., Degerny, C., Tahmasebi, S., Cayrou, C., Doyon, Y., Goh, S.L., Champagne, N., Cote, J., and Yang, X.J. (2008). Molecular architecture of quartet MOZ/MORF histone acetyltransferase complexes. *Mol Cell Biol* 28, 6828-6843.
3. Dymont, D.A., Smith, A.C., Alcantara, D., Schwartzenruber, J.A., Basel-Vanagaite, L., Curry, C.J., Temple, I.K., Reardon, W., Mansour, S., Haq, M.R., Gilbert, R., Lehmann, O.J., Vanstone, M.R., Beaulieu, C.L., et al. (2013). Mutations in PIK3R1 cause SHORT syndrome. *Am J Hum Genet* 93, 158-166.
4. Langouet, M., Saadi, A., Rieunier, G., Moutton, S., Siquier-Pernet, K., Fernet, M., Nitschke, P., Munnich, A., Stern, M.H., Chaouch, M., and Colleaux, L. (2013). Mutation in TTI2 reveals a role for triple T complex in human brain development. *Hum Mutat* 34, 1472-1476.
5. You, J., Sobreira, N.L., Gable, D.L., Jurgens, J., Grange, D.K., Belnap, N., Siniard, A., Szelinger, S., Schrauwen, I., Richholt, R.F., Vallee, S.E., Dinulos, M.B., Valle, D., Armanios, M., et al. (2016). A Syndromic Intellectual Disability Disorder Caused by Variants in TELO2, a Gene Encoding a Component of the TTT Complex. *Am J Hum Genet* 98, 909-918.
